# Human-associated microbiota suppress invading bacteria even under disruption by antibiotics

Andrew D. Letten<sup>\*1,2</sup>, Michael Baumgartner<sup>\*2</sup>, Katia R. Pfrunder-Cardozo<sup>2</sup>, Jonathan Levine<sup>3</sup>, and Alex R. Hall<sup>2</sup>

<sup>1</sup>School of Biological Sciences, University of Queensland, Brisbane, Queensland 4072, Australia

<sup>2</sup>Institute of Integrative Biology, Department of Environmental Systems Science, ETH Zürich, 8092 Zürich, Switzerland

<sup>3</sup>Dept of Ecology and Evolutionary Biology, Princeton University, Princeton, NJ, 08544-1003 USA

September 2, 2020

**Type of article:** Brief Communication

**Number of words:** 995/1000 [main text]; 169/200 [abstract]

**References:** 18/20

**Figures:** 2

**Running headline:** Community suppression of antibiotic resistance

---

\*These authors contributed equally.

Correspondence author. Email: a.letten@uq.edu.au

## 1 **Abstract**

2 In light of their adverse impacts on resident microbial communities, it is widely  
3 predicted that broad-spectrum antibiotics can promote the spread of resistance  
4 by releasing resistant strains from competition with other strains and species. We  
5 investigated the invasion success of a resistant strain of *Escherichia coli* inoculated  
6 into human-associated communities in the presence and absence of the broad and  
7 narrow spectrum antibiotics rifampicin and polymyxin B, respectively. We found  
8 strong evidence of community-level suppression of the resistant strain in the ab-  
9 sence of antibiotics and, despite large changes in community composition and abun-  
10 dance following rifampicin exposure, suppression of the invading resistant strain  
11 was maintained in both antibiotic treatments. Instead, the strength of competitive  
12 suppression was more strongly associated with the individual donor from which  
13 the community was sampled. This suggests microbiome composition strongly in-  
14 fluences susceptibility to invasion by antibiotic-resistant strains, but at least some  
15 antibiotic-associated disruption can be tolerated before invasion susceptibility in-  
16 creases. A deeper understanding of this association will aid the development of  
17 ecologically-aware strategies for managing antibiotic resistance.

18 The overuse of broad-spectrum antibiotics in clinical and agricultural settings is  
19 a key driver of the current antibiotic resistance crisis [1]. Research into antibi-  
20 otic resistance has traditionally focused on the evolution of resistance in individ-  
21 ual pathogens [2]. In the last decade, researchers have turned their attention to  
22 the collateral damage inflicted on commensal members of the microbiome, such as  
23 those belonging to the dense communities of the human gastrointestinal tract [3, 4].  
24 Several studies have shown that antibiotics can leave gut communities vulnerable  
25 to colonisation by other pathogens [5–7], and, most recently, resistance evolution in  
26 invading strains can be facilitated by the absence of community suppression [8, 9].  
27 Taken together, these two lines of enquiry appear to bear out conventional wisdom  
28 that relative to narrow-spectrum antibiotics or antibiotic-free conditions, broad  
29 spectrum antibiotics should increase the likelihood of communities being invaded  
30 by resistant strains [10, 11]. On the other hand, given evidence that community-  
31 level properties can sometimes be robust to changes in taxonomic composition  
32 [12], it is possible that some antibiotic-associated disruption can be tolerated be-  
33 fore colonization resistance is affected. Despite the importance of these contrasting  
34 predictions, there have been few, if any, direct tests in human-associated micro-  
35 biota.

36 We investigated the effect of broad and narrow spectrum antibiotics on the strength  
37 of competitive suppression on a resistant variant of a focal strain (*Escherichia coli*  
38 K-12 MG1655) inoculated into gut microbiome communities collected from hu-  
39 man faecal samples. The focal strain was jointly resistant to the broad-spectrum  
40 antibiotic rifampicin (targets gram-positives and gram-negatives) and the narrow  
41 spectrum antibiotic polymyxin B (only targets gram-negatives). The focal strain  
42 was inoculated alongside live or sterile slurry obtained from one of three healthy  
43 human donors (described in [9]) into customized gut media without antibiotics or  
44 supplemented with 128  $\mu\text{g}/\text{ml}$  rifampicin or 4  $\mu\text{g}/\text{ml}$  polymyxin B. Following 24  
45 hours growth under anaerobic conditions, focal strain density and total biomass  
46 were measured via colony counting and flow cytometry, and community composi-  
47 tion and diversity were analysed via 16S rRNA sequencing.

48 In the absence of either antibiotic, focal strain density after 24 hours was signifi-  
49 cantly lower in the presence of the three donor communities, indicative of strong

50 competitive suppression (Fig. 1a). Surprisingly, we detected similarly strong com-  
51 petitive suppression in both the antibiotic treatments as we did in the antibiotic-  
52 free treatment. Instead, we found that focal strain performance was a stronger  
53 function of the specific donor community, irrespective of antibiotic treatment (Fig.  
54 1b).

55 What makes these results particularly striking is that, consistent with previous  
56 studies [7, 10, 13], treatment with a broad-spectrum antibiotic was still associated  
57 with a marked shift in community composition (analysis of 16S amplicon data)  
58 (Fig. 2a). Based on OTU composition, all three donors in the rifampicin treatment  
59 cluster separately from the polymyxin B and antibiotic-free treatments, which  
60 cluster together (Fig. 2b). This divergence in composition appears to be largely  
61 driven by enrichment of both Enterobacteriaceae and Erysipelotrichaceae in the  
62 rifampicin treatment (Fig. 2a). In addition to strong shifts in composition, total  
63 bacterial abundance was significantly reduced in the rifampicin treatment (Fig. 2c  
64 and Fig. S2). Despite this, total richness and Shannon diversity after 24 hours  
65 did not differ between the treatments (Fig. 2c). In contrast, diversity loss over  
66 time was more strongly associated with donor identity, with the donor community  
67 associated with the weakest competitive suppression (donor 3) also exhibiting the  
68 largest decline in richness and diversity across all treatments.

69 A limitation of this study is that we only considered the effects of two antibi-  
70 otics. Nevertheless, given the scale of community perturbation observed (Fig. 2),  
71 we can at least be sure our findings do not stem from a weak treatment effect.  
72 There must be some limit dictated by antibiotic concentration, combination, or  
73 duration of exposure, beyond which we would expect to observe stronger competi-  
74 tive release. Indeed, prior research has shown that antibiotics can greatly inhibit  
75 colonisation resistance [14, 15]. As such, characterizing where this limit lies will  
76 be an important challenge for future work. Similarly, although we only consid-  
77 ered a single focal strain, and other strains/species may have been more or less  
78 invasive, key for our experiment was that the focal strain had a positive growth  
79 rate over the timescale of the experiment, despite exhibiting significant resistance  
80 costs in antibiotic-free assays (Fig. S1). This allowed us to test for sensitivity  
81 of invasion success to antibiotic treatment. We also note that in spite of a small

82 unanticipated boost in the focal strain's performance in the presence of rifampicin  
83 in the absence of the community (a possible hormetic response [16] absent under  
84 aerobic growth in LB, Fig S1), we did not observe an increase in the magnitude  
85 of competitive release in the rifampicin treatment. Finally, the drop in Shannon  
86 diversity indicates, unsurprisingly, microcosms are a novel environment relative to  
87 the source environment. Despite this, key taxa in each community were stable  
88 over the course of the experiment, and previously over a longer timescale in the  
89 same set-up [9], demonstrating these conditions sustain diverse human-associated  
90 communities over relevant timescales.

91 In conclusion, on the one hand, these results are entirely consistent with prevailing  
92 wisdom that healthy gut communities can suppress invading strains and thereby  
93 reduce the likelihood of resistance emerging [8, 9, 17]. On the other hand, the  
94 absence of a significant effect of broad, or even narrow, spectrum antibiotics on  
95 the degree of competitive suppression of our focal strain is much more surpris-  
96 ing. This shows that the functional diversity of gut communities may be more  
97 robust to disturbance by broad spectrum antibiotics than previously recognised.  
98 This is not to suggest that the use of broad-spectrum antibiotics does not drive  
99 marked changes in composition but rather that there is some degree of functional  
100 redundancy in diverse communities that facilitates the maintenance of competitive  
101 suppression [12, 18]. Notwithstanding the need to test how these findings translate  
102 to *in vivo* settings, this finding is relevant for optimizing personalised treatments  
103 that either account for disruption by antibiotics or that make microbiomes harder  
104 for pathogens to invade.

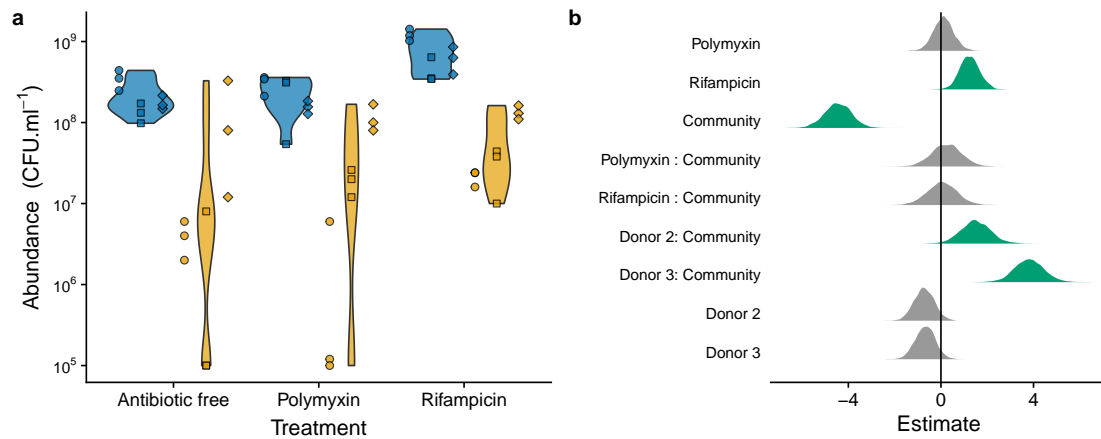

**Figure 1:** (a) Abundance of focal strain in each antibiotic treatment. Blue denotes community free treatments; yellow denotes community treatment. Point shape denotes community/slurry donor: donor 1 = circles, donor 2 = squares, donor 3 = diamonds. (b) Model coefficients (posterior distributions) from a linear model (negative binomial errors) of focal strain abundance as a function of community, antibiotic, and donor, and the interactions between community and antibiotic, and community and donor. Posteriors in green have 95% credible intervals that do not overlap with 0 (i.e., there is less than 5% probability there is no effect of the variables/interactions captured by these coefficients). Intercept (not shown) = Donor 1 in the no antibiotic treatment in the absence of the community (i.e. sterilized slurry)

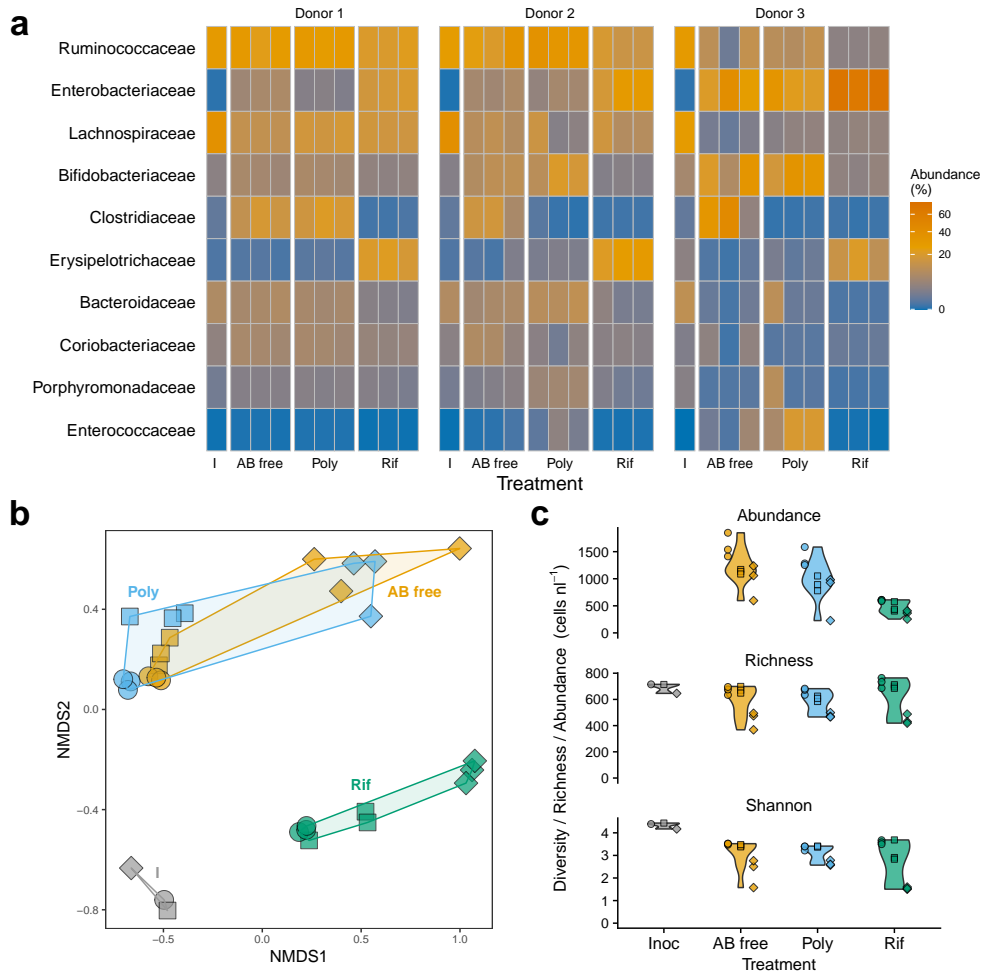

**Figure 2:** (a) Heatmap of relative abundance of the ten most abundant families of bacteria across treatments (derived from amplicon data). I = inoculum; AB free = Antibiotic free; Poly = polymyxin B; Rif = rifampicin. (b) NMDS ordination of family level composition in each treatment-donor combination. (c) Abundance (top), species richness (middle) and Shannon diversity (bottom) in each treatment. In b & c: circles = donor 1; squares = donor 2, diamonds = donor 3.

## 105 Acknowledgements

106 This project received funding from the European Union's Horizon 2020 research  
 107 and innovation programme under the Marie Skłodowska-Curie grant agreement No  
 108 750779. AH acknowledges Swiss National Science Foundation Project 31003A\_165803.  
 109 We thank the Genetic Diversity Centre (GDC) ETH Zurich for sequencing and

110 bioinformatics support.



## 111 References

- 112 [1] Blair, J. M., Webber, M. A., Baylay, A. J., Ogbolu, D. O. & Piddock, L. J.  
113 Molecular mechanisms of antibiotic resistance. *Nature Reviews Microbiology*  
114 **13**, 42–51 (2015).
- 115 [2] Palmer, A. C. & Kishony, R. Understanding, predicting and manipulating  
116 the genotypic evolution of antibiotic resistance. *Nature Reviews Genetics* **14**,  
117 243–248 (2013).
- 118 [3] Blaser, M. J. Antibiotic use and its consequences for the normal microbiome.  
119 *Science* **352**, 544–545 (2016).
- 120 [4] Modi, S. R., Collins, J. J. & Relman, D. A. Antibiotics and the gut microbiota.  
121 *Journal of Clinical Investigation* **124**, 4212–4218 (2014).
- 122 [5] Lawley, T. D. & Walker, A. W. Intestinal colonization resistance. *Immunology*  
123 **138**, 1–11 (2013).
- 124 [6] Libertucci, J. & Young, V. B. The role of the microbiota in infectious diseases.  
125 *Nature Microbiology* **4**, 35–45 (2019).
- 126 [7] Bhalodi, A. A., van Engelen, T. S. R., Virk, H. S. & Wiersinga, W. J. Impact  
127 of antimicrobial therapy on the gut microbiome. *Journal of Antimicrobial*  
128 *Chemotherapy* **74**, i6–i15 (2019).
- 129 [8] Klümper, U. *et al.* Selection for antimicrobial resistance is reduced when  
130 embedded in a natural microbial community. *The ISME Journal* 1–11 (2019).
- 131 [9] Baumgartner, M., Bayer, F., Pfrunder-Cardozo, K. R., Buckling, A. & Hall,  
132 A. R. Resident microbial communities inhibit growth and antibiotic-resistance  
133 evolution of *Escherichia coli* in human gut microbiome samples. *PLOS Biology*  
134 **18**, e3000465 (2020).
- 135 [10] Ianiro, G., Tilg, H. & Gasbarrini, A. Antibiotics as deep modulators of gut  
136 microbiota: Between good and evil. *Gut* **65**, 1906–1915 (2016).

- 137 [11] Spaulding, C. N., Klein, R. D., Schreiber, H. L., Janetka, J. W. & Hultgren,  
138 S. J. Precision antimicrobial therapeutics: The path of least resistance? *npj*  
139 *Biofilms and Microbiomes* **4**, 1–7 (2018).
- 140 [12] Moya, A. & Ferrer, M. Functional Redundancy-Induced Stability of Gut  
141 Microbiota Subjected to Disturbance. *Trends in Microbiology* **24**, 402–413  
142 (2016).
- 143 [13] Jernberg, C., Löfmark, S., Edlund, C. & Jansson, J. K. Long-term impacts  
144 of antibiotic exposure on the human intestinal microbiota. *Microbiology* **156**,  
145 3216–3223 (2010).
- 146 [14] Van Der Waaij, D., Berghuis-de Vries, J. M. & Lekkerkerk-Van Der Wees, J. E.  
147 Colonization resistance of the digestive tract in conventional and antibiotic-  
148 treated mice. *Journal of Hygiene* **69**, 405–411 (1971).
- 149 [15] Kim, S., Covington, A. & Pamer, E. G. The intestinal microbiota: Antibiotics,  
150 colonization resistance, and enteric pathogens. *Immunological Reviews* **279**,  
151 90–105 (2017).
- 152 [16] Mathieu, A. *et al.* Discovery and Function of a General Core Hormetic Stress  
153 Response in *E. coli* Induced by Sublethal Concentrations of Antibiotics. *Cell*  
154 *Reports* **17**, 46–57 (2016).
- 155 [17] Pamer, E. G. Resurrecting the intestinal microbiota to combat antibiotic-  
156 resistant pathogens. *Science* **352**, 535–538 (2016).
- 157 [18] Louca, S. *et al.* Function and functional redundancy in microbial systems.  
158 *Nature Ecology and Evolution* **2**, 936–943 (2018).

## 159 **Supporting Information**

160 Additional supporting information may be found in the online version of this ar-  
161 ticle:
